# Supplementary material
Source: HighWire-hosted journal article supplement (https://bmjopenquality.bmj.com/highwire/filestream/136189/field_highwire_adjunct_files/1/ds5156.docx)
Supplement: ds5156.docx [file ds5156.docx]

**Table 1: Estimated time saving on a normal working day**

| **Time Saving** | **Percentage of Respondents** |
| --- | --- |
| ~ 5 minutes | 31.1% |
| 5-10 minutes | 37.7% |
| 10-30 minutes | 31.1% |

**Table 2: Estimated time saving on a normal on-call**

| **Time Saving** | **Percentage of Respondents** |
| --- | --- |
| 5-10 minutes | 16.4% |
| 10-15 minutes | 19.7% |
| 15-20 minutes | 24.6% |
| >20 minutes | 32.8% |

**Table 3: PDSA Cycles: Finding and Change**

| **PDSA Cycle** | **Findings and Change** |
| --- | --- |
| **1** | **Finding:** Junior doctors taking 2-3 minutes to locate routine clinical equipment – clear need for change. |
| **Change:** Ideas brainstormed and clinical equipment trolley implemented on short-stay ward. |
| **2** | **Finding:** Clinical equipment trolley works! Reduction time to locate most clinical equipment but specific items difficult to locate e.g. blood culture bottles. |
| **Change:** Clinical equipment trolley re-organised with important difficult to find equipment placed in more prominent positions. |
| **3** | **Finding:** Reduction in time to locate previous difficult items – clinical equipment trolley ready for further roll out. |
| **Change:** Clinical equipment rolled out on second site on a specialty ward (Vascular/ ENT). |
| **4** | **Finding:** Maintained reduction in time taken to locate clinical equipment. Clinical equipment trolley concept proven to work but need for organisation chart and restocking guideline identified (see Figure 5) |
| **Change:** Organisation and restocking guideline developed and implemented. Clinical equipment trolleys rolled out on a further 10 surgical wards on two sites. |
| **5** | **Finding:** Maintained reduction in time taken to locate clinical equipment. Positive feedback from colleagues. |
| **Change:** Project completed. Project written up. |
